# Supplementary material for: Advancing anesthesiology trainee proficiency in airway management via simulation-based training: a non-hypoxic apnea duration approach
Source: PeerJ. 2025 Jun 4;13:e19555. doi: 10.7717/peerj.19555 (PMC12145085; doi:10.7717/peerj.19555)
Supplement: Supplemental Information 1 [file peerj-13-19555-s001.xlsx]

## Sheet: GROUP Non-apnea
		Baseline Characteristics						DOPS Assessment											Satisfaction Questionnaire
No.	Date	Gender (1=Male/2=Female)	Age (years)	General Anesthesia Practice Cases	Difficult Airway Assisted Cases	First Stage Operational Exam Score	First Stage Theoretical Exam Score	Mastery of Procedure Indications and Anatomical Theory	Pre-Anesthesia Visit and Informed Consent	Pre-Anesthesia Preparation	Aseptic Technique	Pre-Oxygenation Technique	Difficult Airway Management	Timely Help-Seeking	Crisis Management Capability	Team Cooperation Awareness	Comprehensive Performance	Total Score	Sparked Learning Interest	Helped Understand Theoretical Knowledge	Improved Patient Communication Skills	Improved Difficult Airway Handling Capability	Improved Operational Skill Level	Improved Crisis Management Capability	Improved Team Cooperation Awareness	Helpful for Future Clinical Work	Simulation Realism Comparison	Overall Satisfaction with Simulation Teaching Design	Total Score
1	2021-05-06	2	22	56	2	87	85	6	5	5	5	4	4	6	5	3	5	48	5	5	3	5	5	4	4	5	5	5	46
3	2021-05-06	2	22	63	1	88	82	5	6	7	5	6	5	7	5	4	6	56	4	5	4	5	4	5	4	5	4	5	45
6	2021-07-02	1	23	52	2	83	78	4	5	5	6	5	5	6	3	3	5	47	5	5	4	4	4	5	5	5	4	5	46
7	2021-07-02	1	22	55	2	89	85	5	6	5	6	7	6	7	4	3	6	55	4	5	3	5	5	5	4	5	5	5	46
10	2021-07-02	2	22	59	2	91	87	5	5	3	6	5	5	6	3	3	5	46	5	5	4	5	4	4	4	5	4	5	45
12	2021-09-03	2	22	63	2	85	91	6	6	5	6	7	6	6	4	5	6	57	5	5	3	5	5	5	3	5	3	5	44
13	2021-09-03	1	22	66	3	86	83	5	5	6	5	5	5	5	3	3	5	47	4	5	3	5	4	4	4	5	4	5	43
16	2021-09-03	2	21	59	2	82	86	5	5	5	5	6	5	6	4	5	6	52	5	5	4	5	5	5	4	4	4	4	45
17	2022-01-03	1	22	68	4	85	87	6	7	8	5	5	6	7	3	3	6	56	4	4	4	4	5	5	5	5	4	5	45
20	2022-01-03	2	22	66	2	87	76	5	5	5	6	6	5	6	5	4	6	53	5	5	3	5	4	4	4	5	3	5	43
21	2022-01-03	2	22	67	2	88	79	4	5	7	5	5	5	6	3	3	6	49	5	5	4	5	5	5	3	5	4	5	46
23	2022-01-03	1	23	69	3	90	95	5	7	5	6	7	7	5	4	5	7	58	4	5	3	5	4	4	4	4	5	5	43
26	2022-03-01	1	22	57	2	91	83	5	5	5	5	4	4	6	3	3	5	45	5	5	4	5	5	5	4	5	4	5	47
27	2022-03-01	2	22	55	3	86	80	6	6	7	6	5	5	5	4	4	5	53	5	5	3	5	4	4	3	5	5	5	44
30	2022-03-01	1	22	62	2	87	83	5	5	5	6	5	6	6	3	3	5	49	5	5	3	5	5	5	4	5	5	5	47
		7MALE8FEMALE
Q1 (25th Percentile)			22	56.5	2	85.5	81	5	5	5	5	5	5	6	3	3	5	47.5	4	5	3	5	4	4	4	5	4	5	44
Median (Q2)			22	62	2	87	83	5	5	5	6	5	5	6	4	3	6	52	5	5	3	5	5	5	4	5	4	5	45
Q3 (75th Percentile)			22	66	2.5	88.5	86.5	5.5	6	6.5	6	6	6	6	4	4	6	55.5	5	5	4	5	#VALUE!	5	4	5	5	5	46

## Sheet: GROUP control
		基线资料						DOPS评分											Satisfaction Questionnaire
No.	日期	性别（男=1/女=2）	年龄（岁）	全身麻醉实习例数	困难气道被带教例数	第一阶段操作考试成绩	第一阶段理论考试成绩	掌握操作的适应证及解剖学理论	麻醉前访视与知情同意	麻醉前的准备	无菌操作技术	预给氧技术	困难气道处理	及时寻求帮助	危机应对能力	团队合作意识	综合表现	合计	Sparked Learning Interest	Helped Understand Theoretical Knowledge	Improved Patient Communication Skills	Improved Difficult Airway Handling Capability	Improved Operational Skill Level	Improved Crisis Management Capability	Improved Team Cooperation Awareness	Helpful for Future Clinical Work	Simulation Realism Comparison	Overall Satisfaction with Simulation Teaching Design	Total Score
2	2021-05-06	1	22	62	2	87	79	5	3	3	6	3	3	3	2	3	4	35	5	4	4	5	4	5	3	5	5	5	45
4	2021-05-06	2	23	61	3	88	83	6	4	5	5	4	3	2	3	4	4	40	5	4	3	4	5	4	4	5	3	5	42
5	2021-07-02	2	22	58	3	89	84	6	4	4	5	3	2	4	3	4	5	40	5	5	4	4	4	5	3	4	4	5	43
8	2021-07-02	1	22	59	1	85	87	5	5	7	5	3	4	3	4	3	4	43	5	5	3	4	5	4	4	5	5	5	45
9	2021-09-03	1	22	60	2	91	89	5	3	4	6	4	3	3	4	3	4	39	4	4	4	4	4	4	4	4	4	5	41
11	2021-09-03	2	23	54	3	86	83	5	3	5	6	5	5	3	3	3	5	43	5	4	3	4	5	5	3	5	5	5	44
14	2021-09-03	2	22	57	3	89	89	5	3	4	5	4	4	4	4	4	5	42	5	5	4	5	4	4	4	5	5	5	46
15	2022-01-03	2	23	55	2	85	93	7	4	8	6	6	6	4	5	5	6	57	4	4	3	4	5	5	3	4	3	4	39
18	2022-01-03	2	21	64	2	83	90	5	4	3	6	4	4	6	5	3	5	45	5	4	3	4	4	4	4	5	4	5	42
19	2022-01-03	1	22	65	3	87	89	6	3	4	5	3	3	5	4	4	4	41	4	4	4	5	4	4	5	5	5	5	45
22	2022-01-03	2	22	66	2	89	88	6	4	6	6	6	5	4	3	3	6	49	5	4	3	4	4	5	4	5	4	5	43
24	2022-03-01	1	22	62	3	82	86	7	4	5	6	5	4	3	2	3	5	44	5	4	4	4	4	4	3	4	5	5	42
25	2022-03-01	2	22	61	2	83	85	6	4	4	6	4	3	6	5	5	5	48	5	4	4	4	5	5	4	5	4	5	45
28	2022-03-01	2	23	56	2	85	79	5	3	3	5	4	4	3	3	3	4	37	5	4	3	4	4	4	3	4	5	5	41
29	2022-03-01	2	22	57	2	81	78	5	4	4	6	5	4	3	3	3	5	42	5	5	4	4	4	4	4	5	4	5	44
		5男10女
Q1 (25th Percentile)			22	57	2	84	83	5	3	4	5	3.5	3	3	3	3	4	40	5	4	3	4	4	4	3	4	4	5	42
Median (Q2)			22	60	2	86	86	5	4	4	6	4	4	3	3	3	5	42	5	4	4	4	4	4	4	5	4	5	43
Q3 (75th Percentile)			22.5	62	3	88.5	89	6	4	5	6	5	4	4	4	4	5	44.5	5	4.5	4	4	5	5	4	5	5	5	45

## Sheet: Group Drawing Results
Group Drawing Results and Basic Information of Trainees
ID	Group	Gender (Male=1/Female=2)	Age (years)	Total Anesthesia Internship Cases	Difficult Airway Cases Taught	First Stage Operation Exam Score	First Stage Theory Exam Score	Simulation Training Date
1	Predictive	2	22	56	2	87	85	2021-05-06
2	Control	1	22	62	2	87	79	2021-05-06
3	Predictive	2	22	63	1	88	82	2021-05-06
4	Control	2	23	61	3	88	83	2021-05-06
5	Control	2	22	58	3	89	84	2021-07-02
6	Predictive	1	23	52	2	83	78	2021-07-02
7	Predictive	1	22	55	2	89	85	2021-07-02
8	Control	1	22	59	1	85	87	2021-07-02
9	Control	1	22	60	2	91	89	2021-09-03
10	Predictive	2	22	59	2	91	87	2021-07-02
11	Control	2	23	54	3	86	83	2021-09-03
12	Predictive	2	22	63	2	85	91	2021-09-03
13	Predictive	1	22	66	3	86	83	2021-09-03
14	Control	2	22	57	3	89	89	2021-09-03
15	Control	2	23	55	2	85	93	2022-01-03
16	Predictive	2	21	59	2	82	86	2021-09-03
17	Predictive	1	22	68	4	85	87	2022-01-03
18	Control	2	21	64	2	83	90	2022-01-03
19	Control	1	22	65	3	87	89	2022-01-03
20	Predictive	2	22	66	2	87	76	2022-01-03
21	Predictive	2	22	67	2	88	79	2022-01-03
22	Control	2	22	66	2	89	88	2022-01-03
23	Predictive	1	23	69	3	90	95	2022-01-03
24	Control	1	22	62	3	82	86	2022-03-01
25	Control	2	22	61	2	83	85	2022-03-01
26	Predictive	1	22	57	2	91	83	2022-03-01
27	Predictive	2	22	55	3	86	80	2022-03-01
28	Control	2	23	56	2	85	79	2022-03-01
29	Control	2	22	57	2	81	78	2022-03-01
30	Predictive	1	22	62	2	87	83	2022-03-01

## Sheet: DOPS Assessment
							NO.：
Direct Observation of Procedural Skills (DOPS) Assessment
DOPS Scoring Categories	Performance below expected level			Performance at expected level			Performance exceeding expected level
	1 point	2 points	3 points	4 points	5 points	6 points	7 points	8 points	9 points
Mastery of Indications and Anatomical Theory
Pre-Anesthesia Visit and Informed Consent
Pre-Anesthesia Preparation
Aseptic Technique
Pre-Oxygenation Technique
Difficult Airway Management
Timely Help-Seeking
Crisis Management Ability
Team Cooperation Awareness
Overall Performance
Total Score（99 points）
						Signature：

## Sheet: Satisfaction Ques
				NO.：
Satisfaction Questionnaire
Items	1 point	2 points	3 points	4 points	5 points
	Strongly Disagree	Disagree	Uncertain	Agree	Strongly Agree
Sparked learning interest
Helped understand theoretical knowledge
Improved patient communication skills
Improved difficult airway management skills
Improved operational level
Improved crisis management skills
Improved team cooperation awareness
Helpful for future clinical work
Simulation realism
Overall satisfaction with simulation design
Total Score（50 points）
			Signature:
